# Supplementary material
Source: PubMed Central journal article supplement (PMC3030341)
Supplement: supp_M110.190496_jbc.M110.190496-4.pdf [file supp_M110.190496_jbc.M110.190496-4.pdf]

**Table S1. Data collection and refinement statistics**

---

| <b>Data collection</b>                              |                                                                |
|-----------------------------------------------------|----------------------------------------------------------------|
| Space group                                         | P222 <sub>1</sub>                                              |
| Cell dimensions <i>a</i> , <i>b</i> , <i>c</i> (Å)  | 70.39, 83.68, 190.15                                           |
| Resolution (Å)                                      | 28.88 – 2.38 (2.40 – 2.38)                                     |
| <i>R</i> <sub>merge</sub> (%)                       | 6.5 (76.1)                                                     |
| <i>I</i> / <i>σ</i> <i>I</i>                        | 27.3 (2.2)                                                     |
| Unique reflections                                  | 45,283 (1,094)                                                 |
| Completeness (%)                                    | 98.8 (100.0)                                                   |
| Redundancy                                          | 6.0 (6.0)                                                      |
| Wilson B-factor (Å <sup>2</sup> )                   | 59.4                                                           |
| <b>Refinement</b>                                   |                                                                |
| Resolution (Å)                                      | 28.88 – 2.38 (2.44 – 2.38)                                     |
| No. of reflections (work/free)                      | 43,755/1,528 (3,186/105)                                       |
| Cut-off (s)                                         | 0                                                              |
| <i>R</i> <sub>work</sub> / <i>R</i> <sub>free</sub> | 22.8/26.5 (28.0/30.0)                                          |
| No. of atoms                                        |                                                                |
| Protein                                             | 5,094                                                          |
| Peptide                                             | 549                                                            |
| GDP                                                 | 56                                                             |
| Ions                                                | 15                                                             |
| Water                                               | 97                                                             |
| <i>B</i> -factors (Å <sup>2</sup> )                 |                                                                |
| Protein                                             | 60.7                                                           |
| Peptide                                             | 79.7                                                           |
| GDP                                                 | 45.5                                                           |
| Ions                                                | 102.2                                                          |
| Water                                               | 51.4                                                           |
| R.m.s. deviations                                   |                                                                |
| Bond lengths (Å)                                    | 0.009                                                          |
| Bond angles (°)                                     | 1.086                                                          |
| Ramachandran                                        |                                                                |
| Favored (%)                                         | 98.0                                                           |
| Generally Allowed (%)                               | 2.0                                                            |
| Disallowed (%)                                      | 0.0                                                            |
| Missing residues                                    | A: 27-31, 348-354<br>B: 27-31, 349-354<br>C: 496<br>D: 530-531 |

---

Values in parentheses denote highest resolution shell
