# Supplementary material
Source: PubMed Central journal article supplement (PMC3030341)

All-helical domain

Ras-like domain

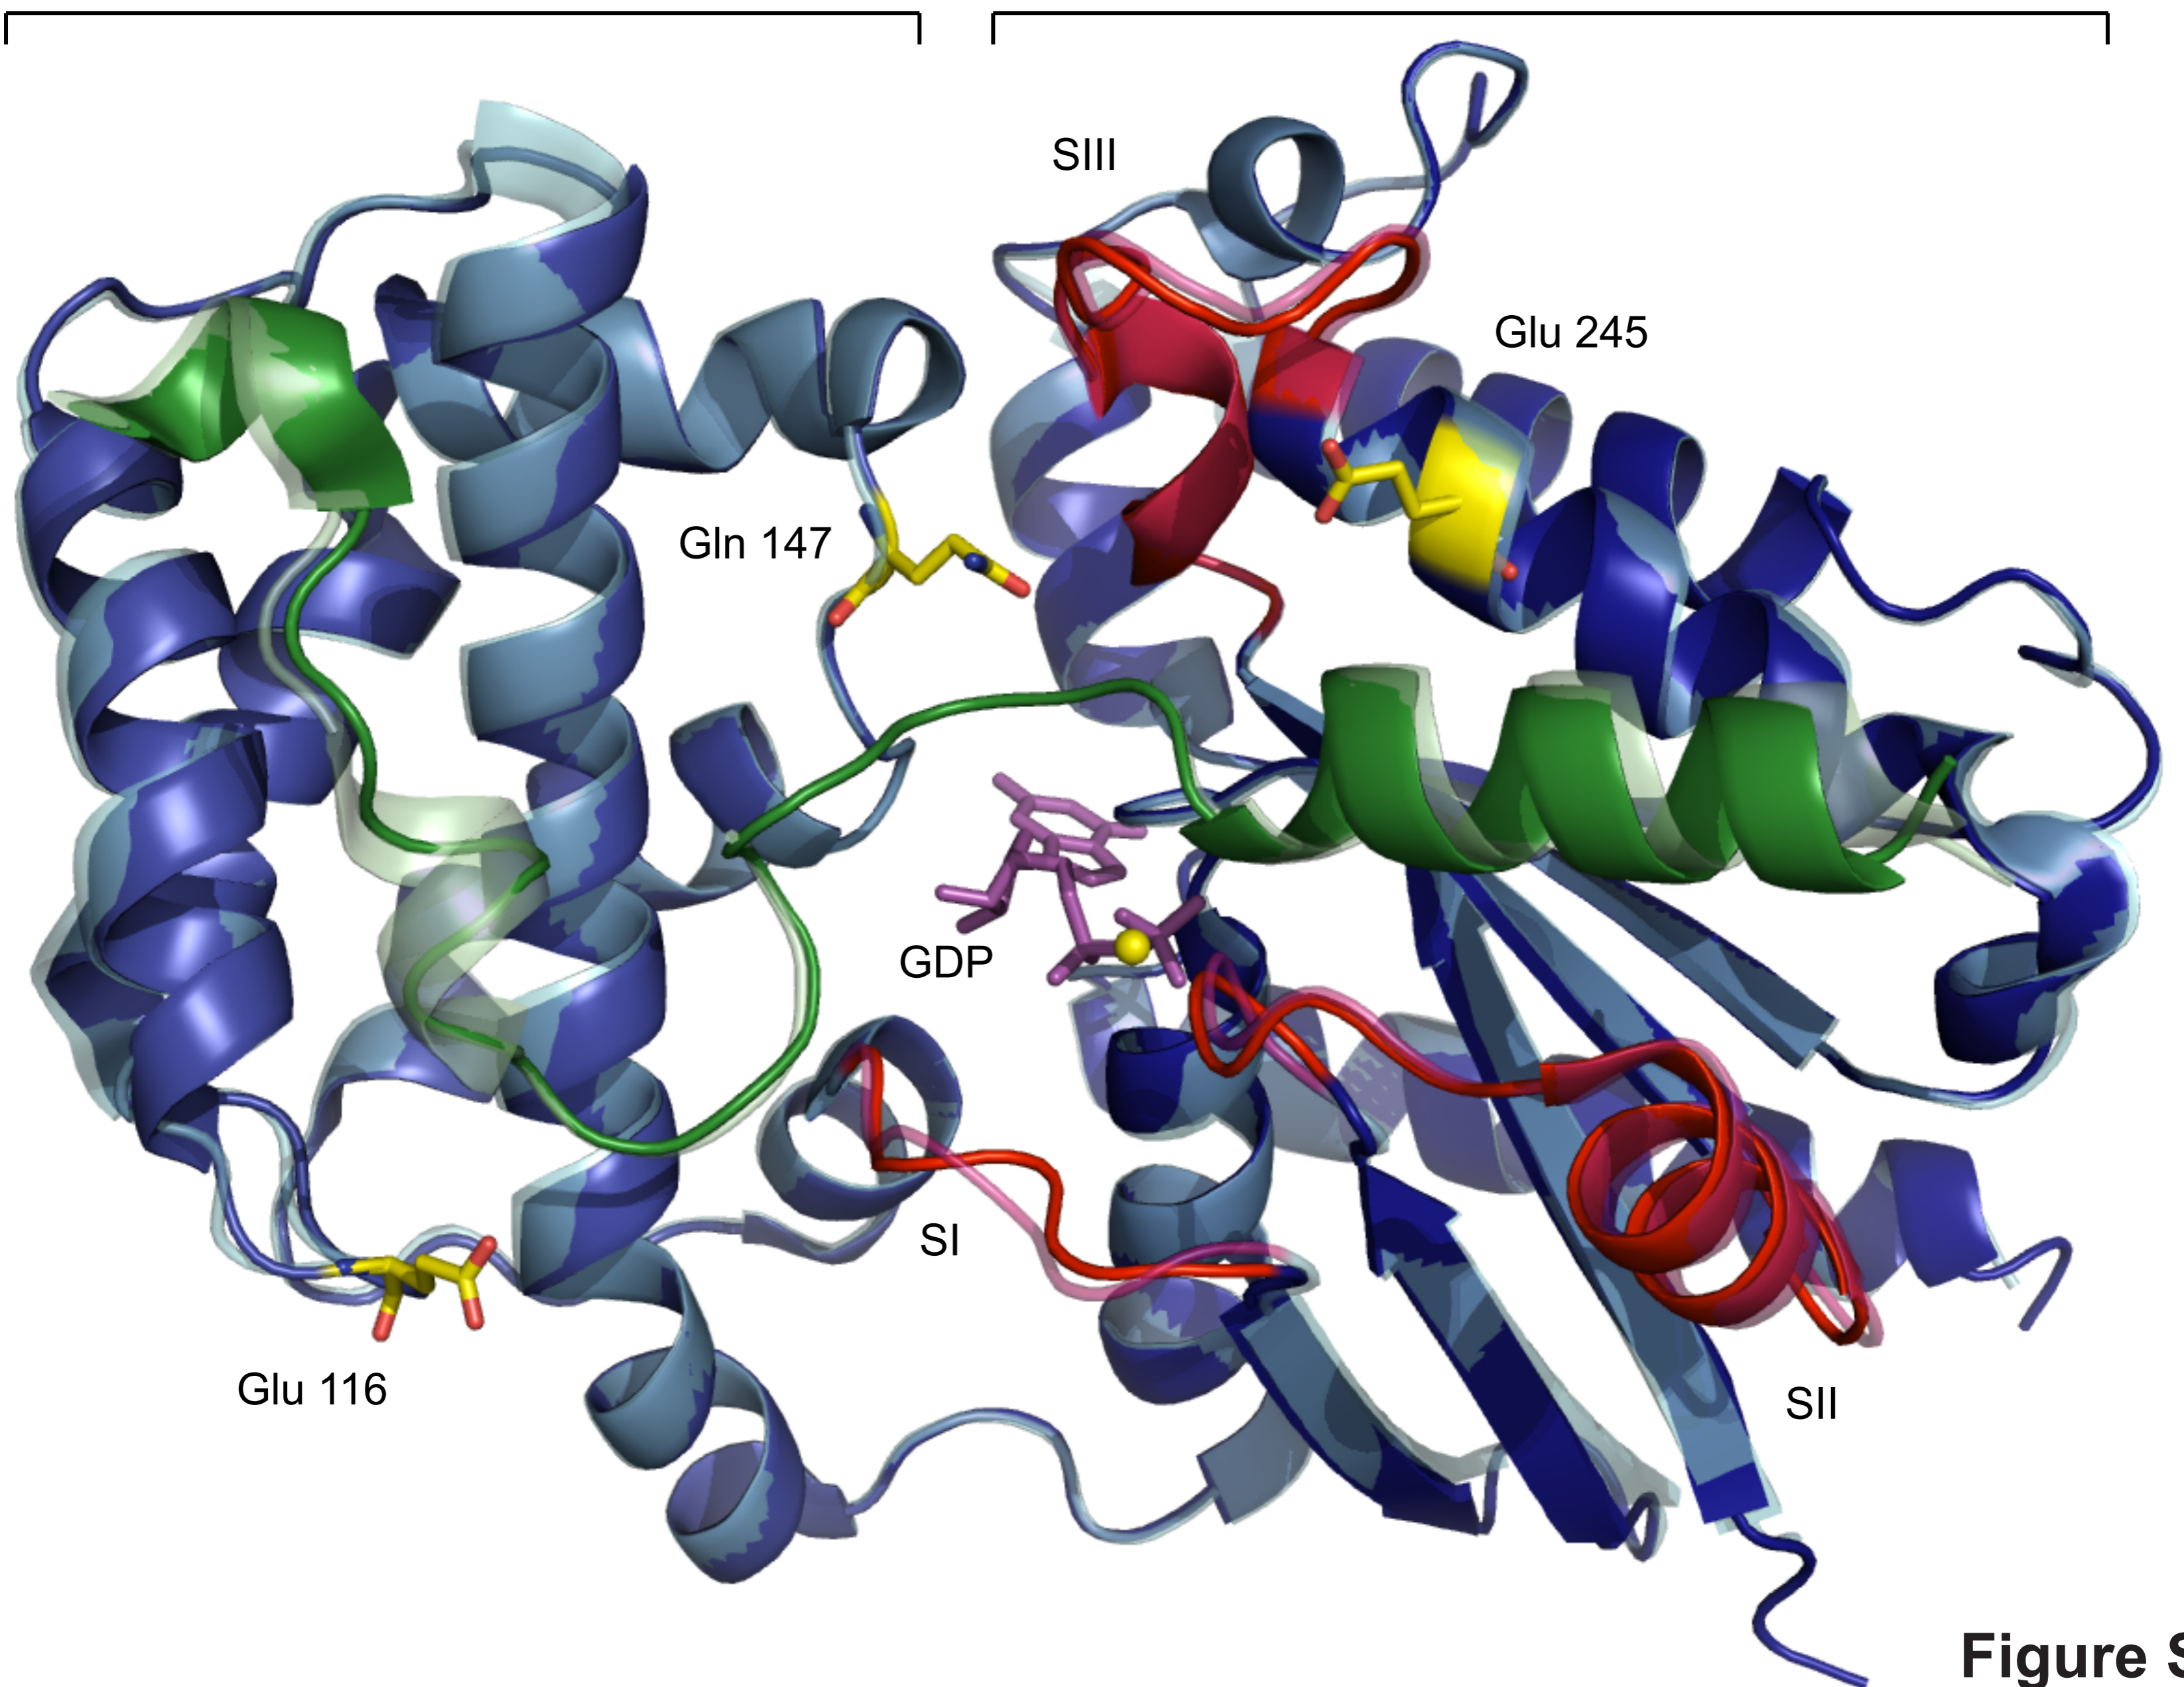

Figure S1

Supplement: supp_M110.190496_jbc.M110.190496-1.pdf [file supp_M110.190496_jbc.M110.190496-1.pdf]

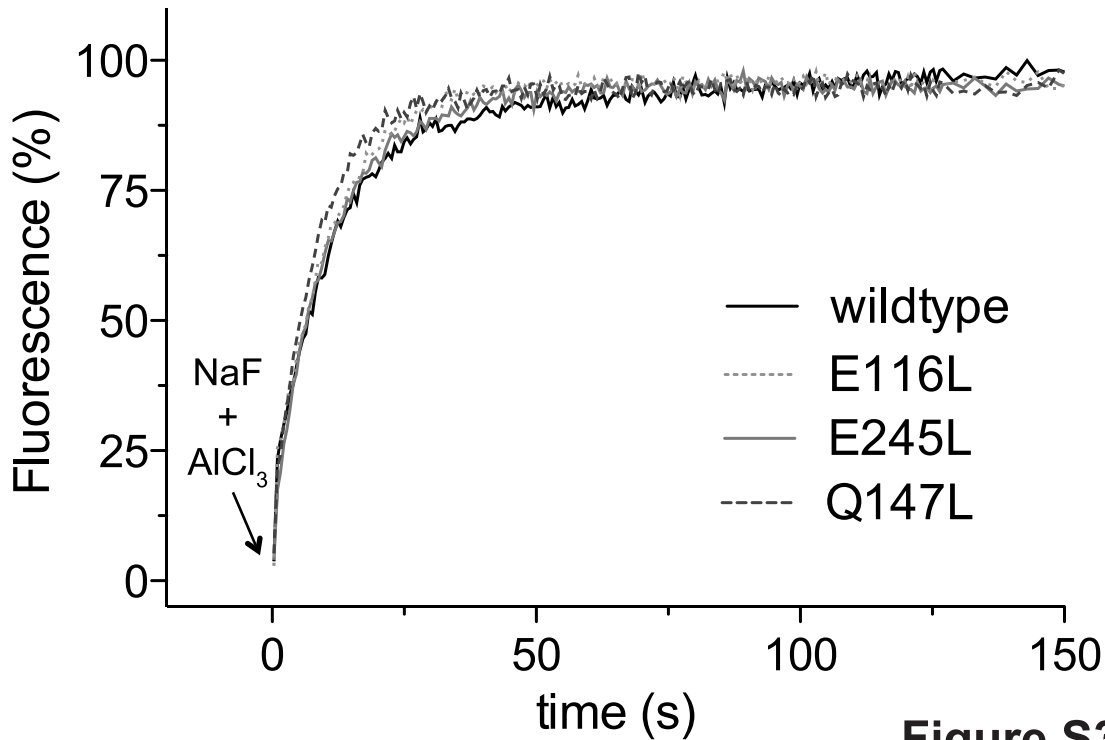

**Figure S3**

Supplement: supp_M110.190496_jbc.M110.190496-3.pdf [file supp_M110.190496_jbc.M110.190496-3.pdf]
